# Supplementary material
Source: PubMed Central journal article supplement (PMC4485005)
Supplement: peds.2014-3047_peds.2014-3047SupplementaryData.pdf [file peds.2014-3047_peds.2014-3047SupplementaryData.pdf]

## Supplemental Information

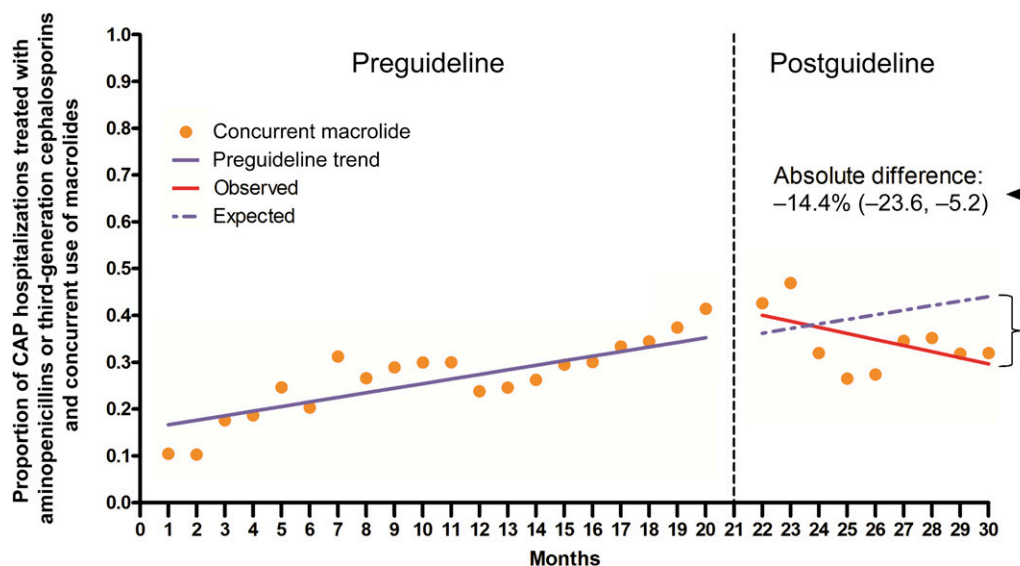

### SUPPLEMENTAL FIGURE 2

Changes in concurrent use of macrolides with third-generation cephalosporins or penicillin/ampicillin for children hospitalized with CAP at 3 US children's hospitals after release of national consensus guidelines, January 2010 to June 2012. Seasonally adjusted estimates; the vertical dashed line indicates the month the guidelines were first released (August 30, 2011); the pre- and postguideline periods included January 2010 to August 2011 and October 2011 to June 2012, respectively; absolute difference (%) was calculated by comparing the observed antibiotic prescribing patterns by the end of the study period (estimated from the postguideline regression model) with the expected antibiotic prescribing by the end of the study period had the guideline not been released (estimated from the preguideline trend).

**SUPPLEMENTAL TABLE 5** Changes in Concurrent Use of Macrolides With Third-generation Cephalosporins or Penicillin/Ampicillin for Children Hospitalized With CAP at 3 US Children's Hospitals, January 2010 to June 2012

| Site       | Concurrent Macrolide Use |             |                                 |
|------------|--------------------------|-------------|---------------------------------|
|            | Observed, %              | Expected, % | Absolute Difference, % (95% CI) |
| Hospital A | 37.9                     | 44.5        | -6.7 (-21.8 to 8.5)             |
| Hospital B | 14.9                     | 36.0        | -21.0 (-50.5 to 8.4)            |
| Hospital C | 18.6                     | 40.9        | -22.3 (-45.7 to 1.2)            |
| All Sites  | 29.6                     | 44.0        | -14.4 (-23.6 to -5.2)           |

Absolute difference was calculated by comparing the observed antibiotic prescribing patterns by the end of the study period (observed use estimated from the postguideline regression model) with the expected antibiotic prescribing by the end of the study period had the guideline not been released (expected use estimated from the preguideline trend).
